# Supplementary material for: Xeno-free and feeder-free culture and differentiation of human embryonic stem cells on recombinant vitronectin-grafted hydrogels
Source: Royal Society of Chemistry journal article supplement (doi:10.1039/c9bm00418a), 2019-01-01
Supplement: c9bm00418a1.pdf [file c9bm00418a1.pdf]

## Supplementary Information

### **Xeno-free and feeder-free culture and differentiation of human embryonic stem cells on recombinant vitronectin-grafted hydrogels**

Li-Hua Chen,<sup>†a</sup> Tzu-Cheng Sung,<sup>†a</sup> Henry Hsin-Chung Lee,<sup>†bc</sup> Akon Higuchi,<sup>\*adek</sup> Huan-Chiao Su,<sup>a</sup> Kuan-Ju Lin,<sup>a</sup> Yu-Ru Huang,<sup>a</sup> Qing-Dong Ling,<sup>fg</sup> S. Suresh Kumar,<sup>h</sup> Abdullah A. Alarfaj,<sup>d</sup> Murugan A. Munusamy,<sup>d</sup> Michiyo Nasu,<sup>c</sup> Da-Chung Chen,<sup>i</sup> Shih-Tien Hsu,<sup>j</sup> Yung Chang<sup>k</sup>, Kuei-Fang Lee<sup>l</sup>, Han-Chow Wang<sup>m</sup>, Akihiro Umezawa<sup>c</sup>

<sup>a</sup>Department of Chemical and Materials Engineering, National Central University, No. 300, Jhongda RD., Jhongli, Taoyuan, 32001 Taiwan

<sup>b</sup>Department of Surgery, Hsinchu Cathay General Hospital, No. 678, Sec 2, Zhonghua Rd., Hsinchu, 30060, Taiwan

<sup>c</sup>Graduate Institute of Translational and Interdisciplinary Medicine, National Central University, No. 300, Jhongda RD., Jhongli, Taoyuan, 32001 Taiwan

<sup>d</sup>Department of Botany and Microbiology, College of Science, King Saud University, Riyadh 11451, Saudi Arabia

<sup>e</sup>Department of Reproduction, National Center for Child Health and Development, 2-10-1 Okura, Setagaya-ku, Tokyo 157-8535, Japan

<sup>f</sup>Graduate Institute of Systems Biology and Bioinformatics, National Central University, No. 300, Jhongda RD., Jhongli, Taoyuan, 32001 Taiwan

<sup>g</sup>Cathay Medical Research Institute, Cathay General Hospital, No. 32, Ln 160, Jian-Cheng Road, Hsi-Chi City, Taipei, 221, Taiwan

<sup>h</sup>Department of Medical Microbiology and Parasitology, Universiti Putra Malaysia, 43400 Serdang, Slangor, Malaysia

<sup>i</sup>Department of Obstetrics and Gynecology, Taiwan Landseed Hospital, 77, Kuangtai Road, Pingjen City, Taoyuan 32405, Taiwan

<sup>j</sup>Department of Internal Medicine, Taiwan Landseed Hospital, 77, Kuangtai Road, Pingjen City, Taoyuan 32405, Taiwan

<sup>k</sup>Department of Chemical Engineering, R&D Center for Membrane Technology, Chung Yuan Christian University, 200, Chung-Bei Rd., Chungli, Taoyuan, 320, Taiwan

<sup>l</sup>Precision Medical laboratory, Lee's OB/GYN Clinic, No. 9, Ln. 31, Sec. 2, Jinshan S. Rd., Da'an Dist., Taipei 106, Taiwan

<sup>m</sup>Department of Obstetrics and Gynecology, Hungchi Women & Children's Hospital, Taoyuan 320, Taiwan

\* Corresponding author, E-mail: [higuchi@ncu.edu.tw](mailto:higuchi@ncu.edu.tw) (A. Higuchi)

<sup>l</sup>These authors contributed equally to this work.

## Supplementary Figures and Notes

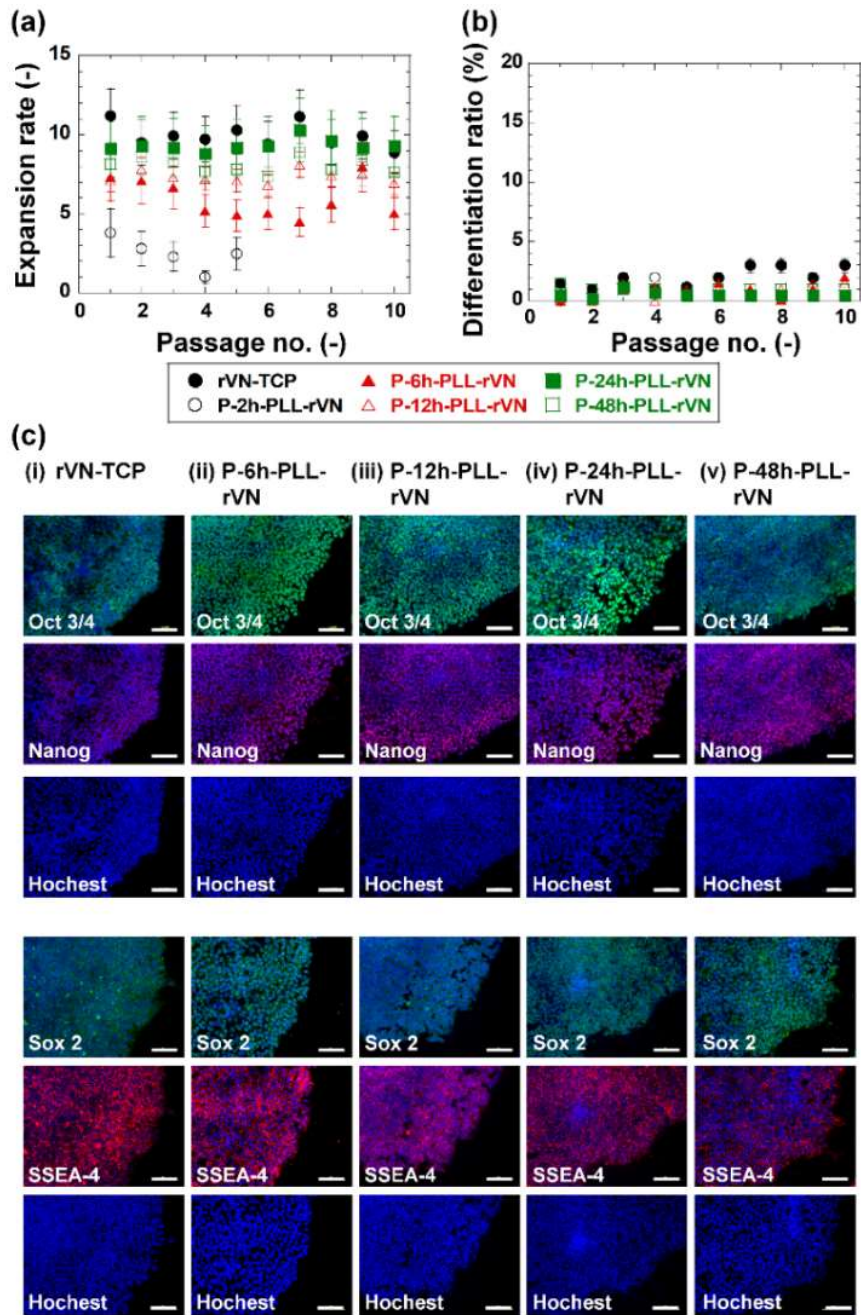

**Fig. 1S** Long-term culture and characterization of HPS0077 human induced pluripotent stem cells (hiPSCs) on PVI hydrogels grafted with PLL and rVN under feeder-free and xeno-free culture conditions. (a, b) Expansion rate (a) and differentiation ratio (b) of HPS0077 hiPSCs on rVN-TCP dishes prepared with 5  $\mu$ g/mL rVN coating solution (closed circles), P-2h-PLL-rVN hydrogels (open circles), P-6h-PLL-rVN hydrogels (open squares), and P-24h-PLL-rVN hydrogels (closed squares) for 10 passages. P-Xh-PLL-rVN hydrogels were prepared with 1 mg/mL PLL solution and 10  $\mu$ g/mL rVN solution. (c) Expression of pluripotency proteins SSEA-4 (red), Sox2 (green), Nanog (red), and Oct3/4 (green) on HPS0077 hiPSCs evaluated by immunostaining with dual staining with Hoechst33342 for nuclear (blue) after culturing on (i) rVN-TCP dishes prepared with 5  $\mu$ g/mL rVN coating solution, (ii) P-6h-PLL-rVN hydrogels, (iii) P-12h-PLL-rVN hydrogels, (iv) P-24h-PLL-rVN hydrogels, and (v) P-48h-PLL-rVN hydrogels for 10 passages. P-Xh-PLL-rVN hydrogels were prepared with 1 mg/mL PLL solution and 10  $\mu$ g/mL rVN solution. Scale bar indicates 100  $\mu$ m.

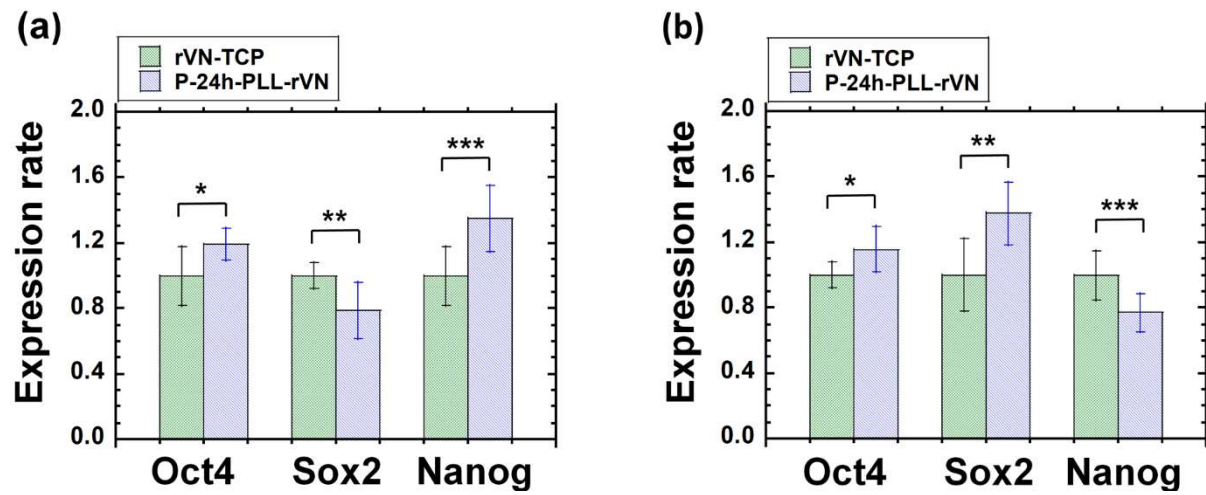

**Fig. 2S** Relative gene expression levels of *Oct4*, *Sox2*, and *Nanog* as analyzed by qRT-PCR in (a) hESCs and (b) hiPSCs after culturing on P-24h-PLL-rVN hydrogels or rVN-TCP dishes for 10 passages. The gene expression levels were standardized with the levels expressed of hESCs of hiPSCs after culturing on rVN-TCP dishes for 10 passages. \* $p < 0.05$ ; \*\* $p < 0.01$ ; \*\*\* $p < 0.001$ .

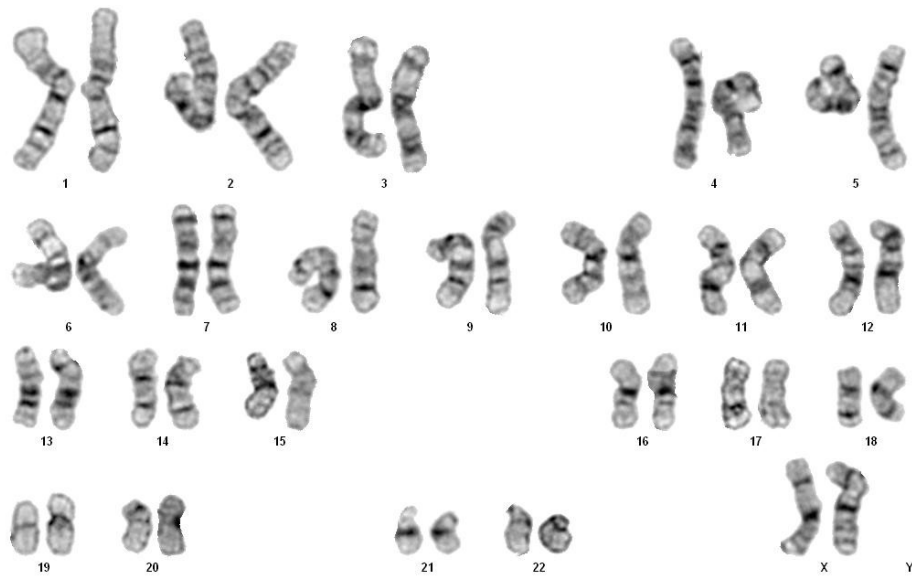

**Fig. 3S** Karyotyping analysis of hiPSCs after culturing on P-24h-PLL-rVN for 10 passages.

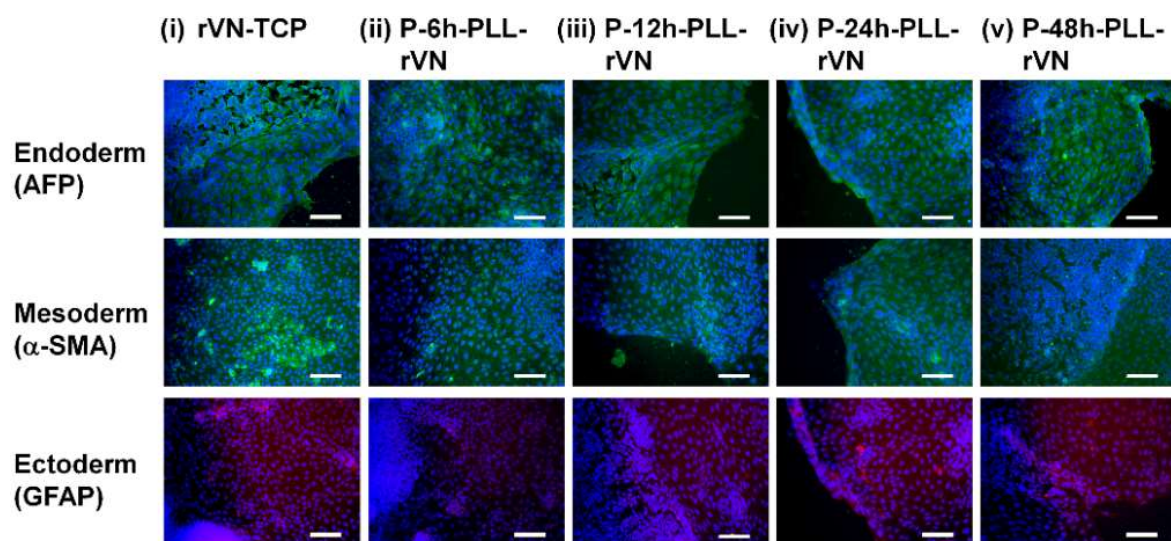

**Fig. 4S** Characterization of the differentiation ability of HPS0077 hiPSCs in vitro and in vivo after culturing on PVI hydrogels. (b) Expression of an ectoderm protein (GFAP, red), mesoderm protein ( $\alpha$ -SMA, green), and endoderm protein (AFP, green) in HPS0077 hiPSCs analyzed by immunostaining with dual staining with Hoechst33342 for nuclear (blue) after culturing on (i) rVN-TCP(5) dishes and (ii) P-6h-PLL-rVN, (iii) P-12h-PLL-rVN, (iv) P-24h-PLL-rVN, and (v) P-48h-PLL-rVN hydrogels for 10 passages. Scale bar indicates 100  $\mu$ m.

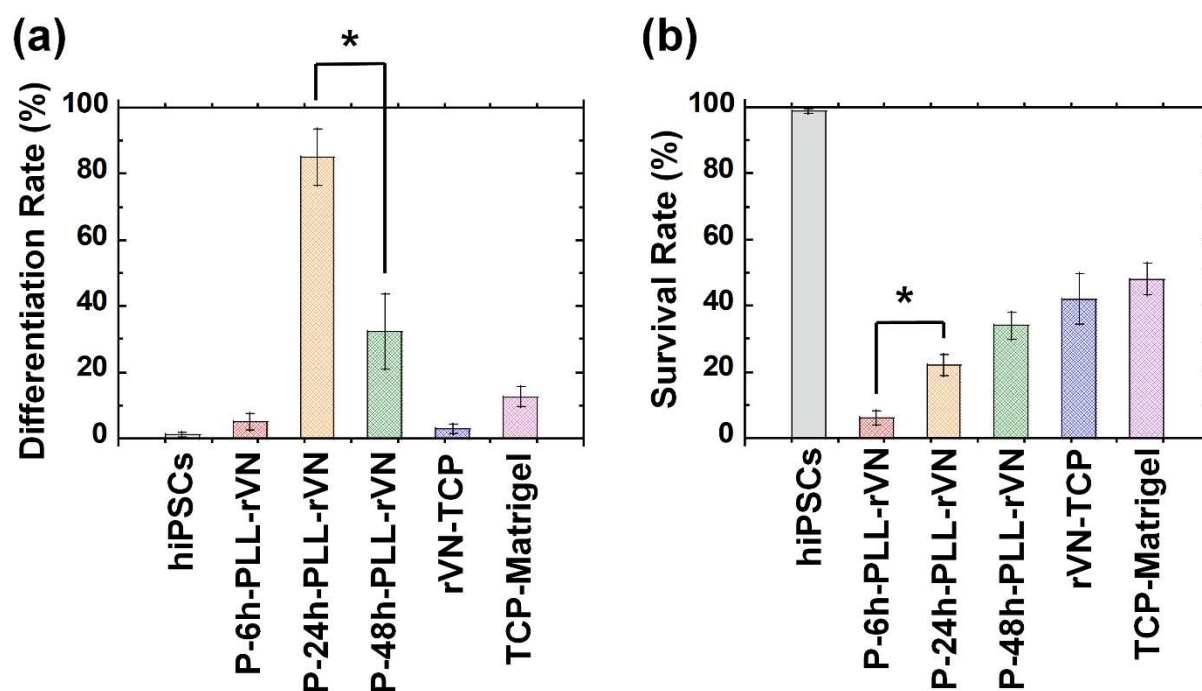

**Fig. 5S** Characterization of differentiation of HPS0077 hiPSCs into cardiomyocytes during culture on PVI hydrogels grafted with PLL and rVN under feeder-free and xeno-free culture conditions. (a) Differentiation rate of cells from HPS0077 hiPSCs cultivated on P-6h-PLL-rVN hydrogels, P-24h-PLL-rVN hydrogels, P-48h-PLL-rVN hydrogels, rVN-TCP dishes prepared with 5  $\mu$ g/mL rVN coating solution, and Matrigel-coated dishes after 12 days of induction. Differentiation rate of HPS0077 hiPSCs is also plotted. (b) Survival rate of differentiated HPS0077 hiPSCs cultivated on P-6h-PLL-rVN hydrogels, P-24h-PLL-rVN hydrogels, P-48h-PLL-rVN hydrogels, rVN-TCP dishes prepared with 5  $\mu$ g/mL rVN coating solution, and Matrigel-coated dishes after 12 days of induction. Survival rate of HPS0077 hiPSCs is also plotted. \* $p$  < 0.05.
